# Supplementary material
Source: PubMed Central journal article supplement (PMC9950061)

**Fig 1D**

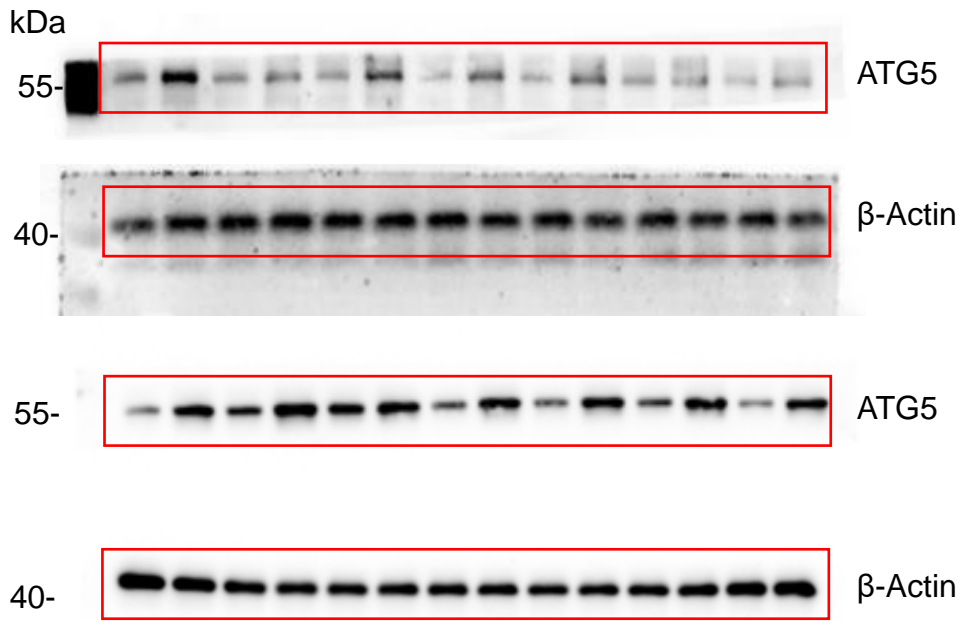

**Fig 1E**

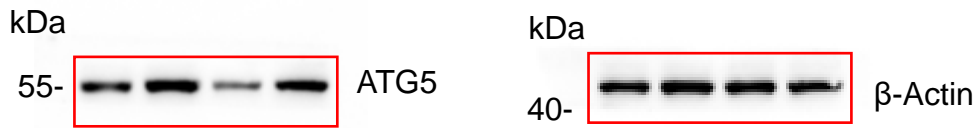

**Fig 2A**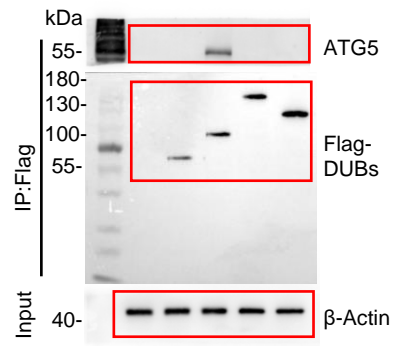**Fig 2B**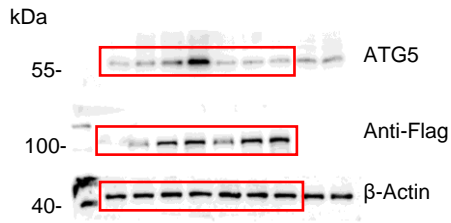**Fig 2C**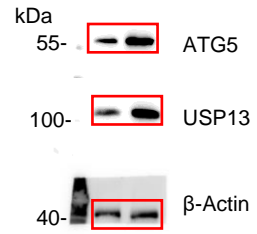**Fig 2D**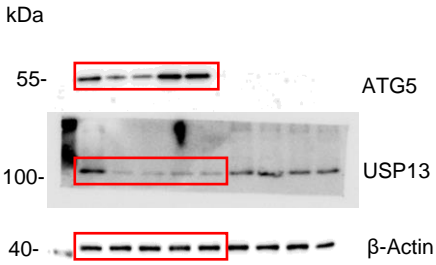**Fig 2E**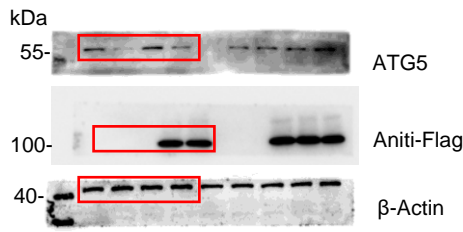**Fig 2F**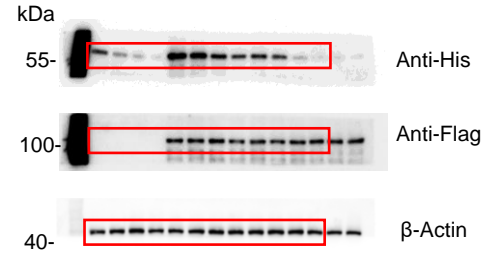**Fig 2H**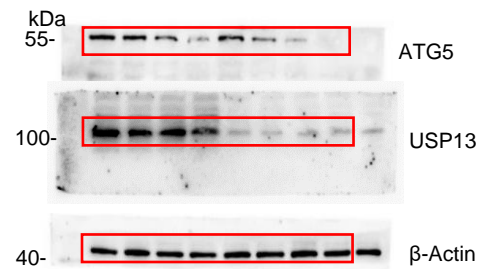**Fig 2J**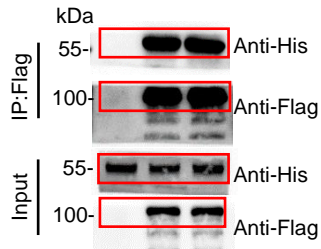**Fig 2L**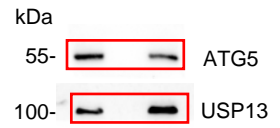**Fig 2M**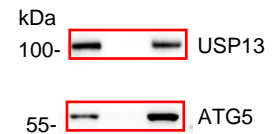**Fig 2N**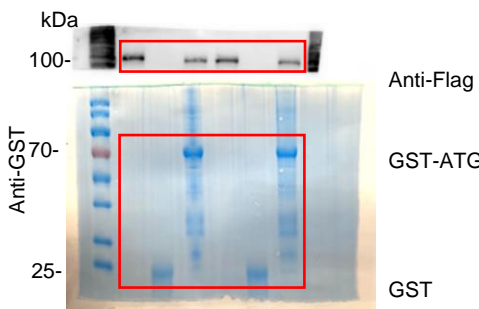**Fig 2P**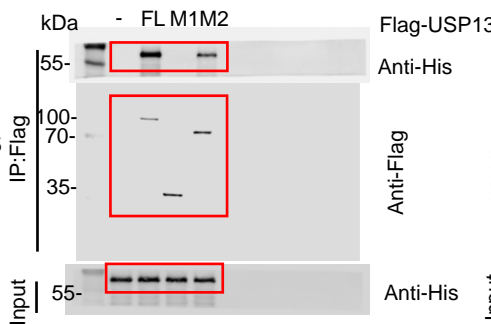**Fig 2Q**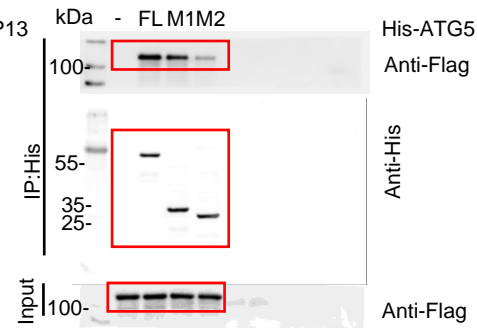

**Fig 3A**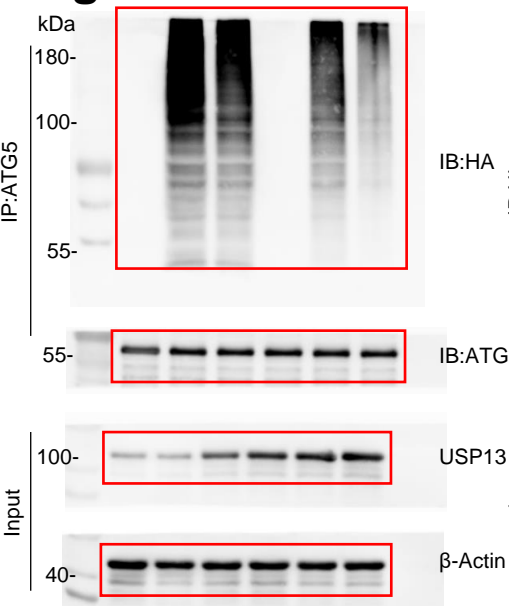**Fig 3B**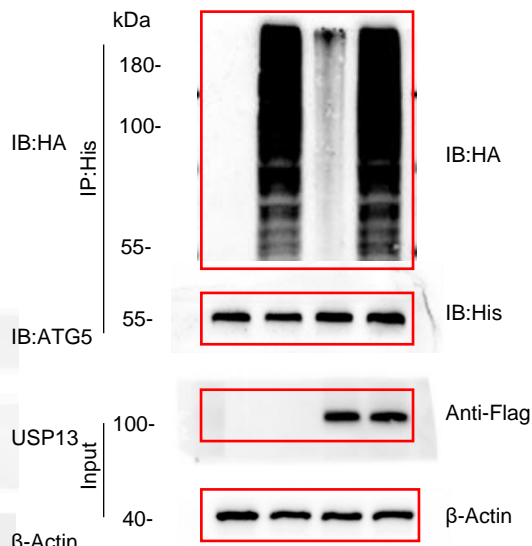**Fig 3C**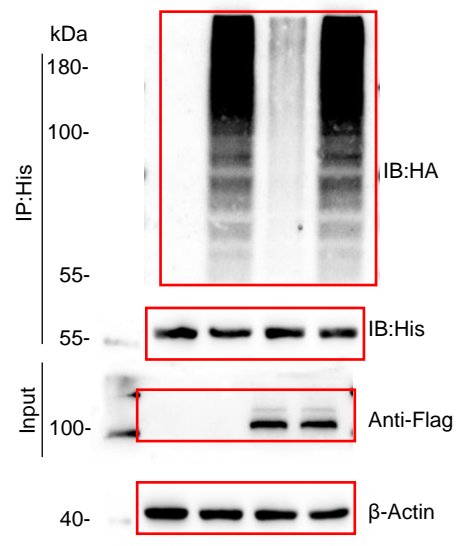**Fig 3D**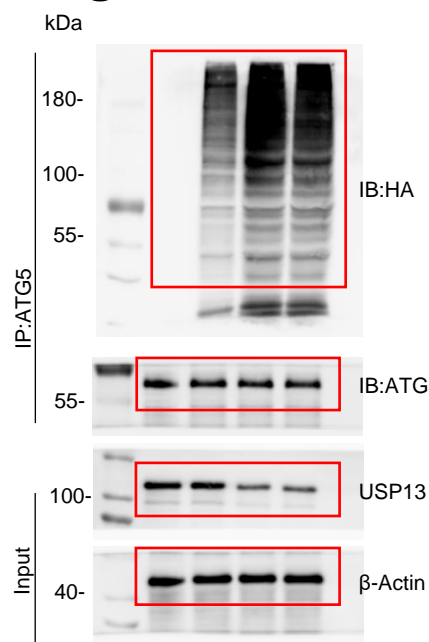**Fig 3E**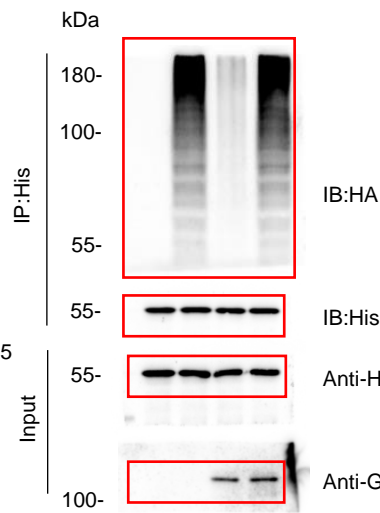**Fig 3F**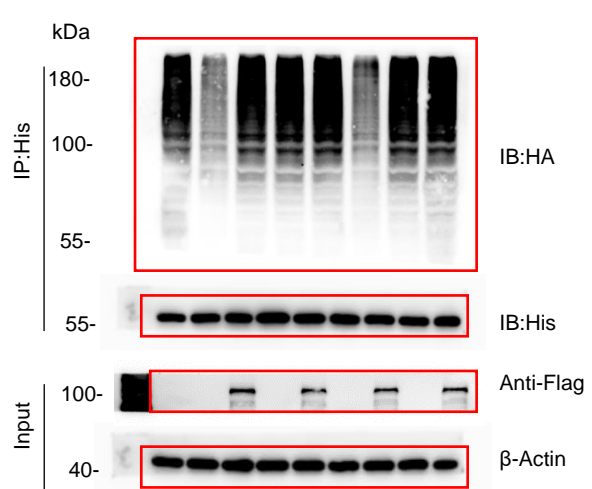**Fig 3G**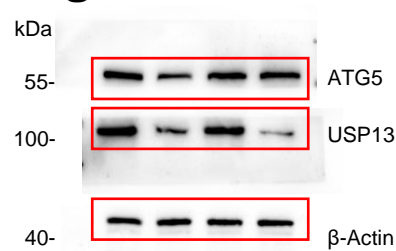**Fig 3H**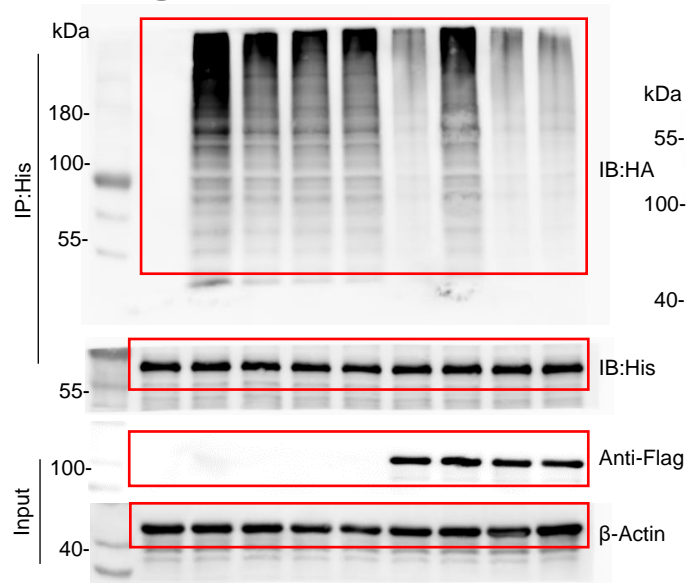**Fig 3I**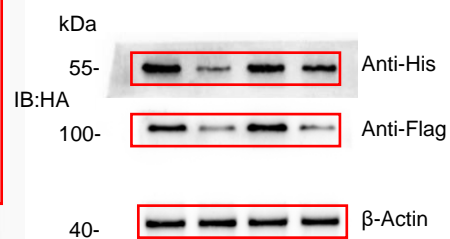

**Fig 4C**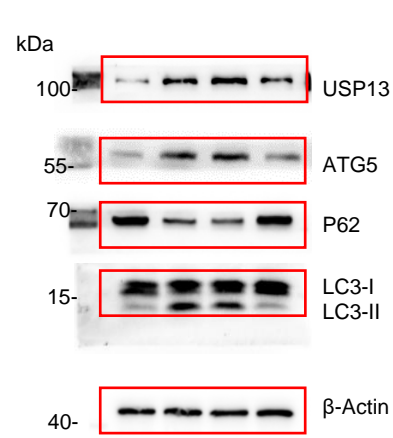**Fig 4D**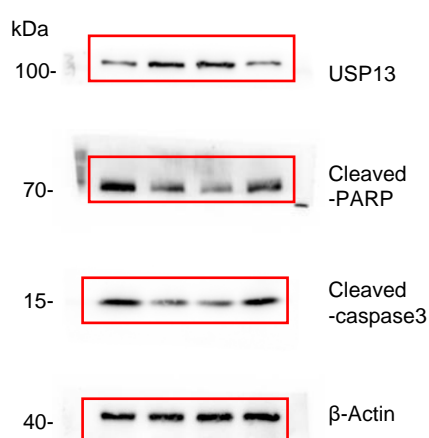**Fig 4H**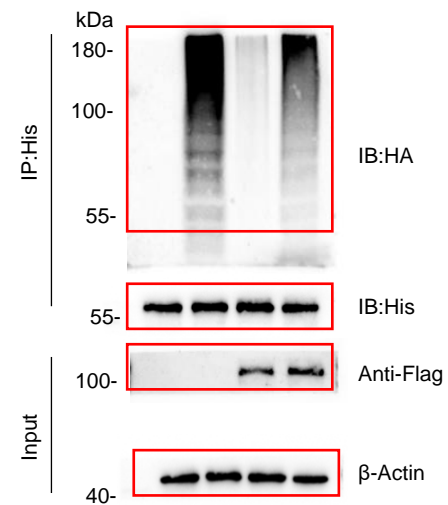**Fig 4I**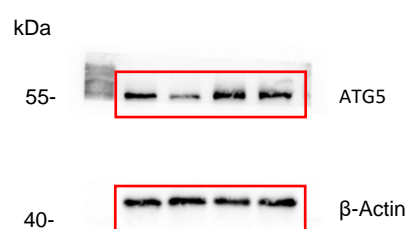**Fig 4J**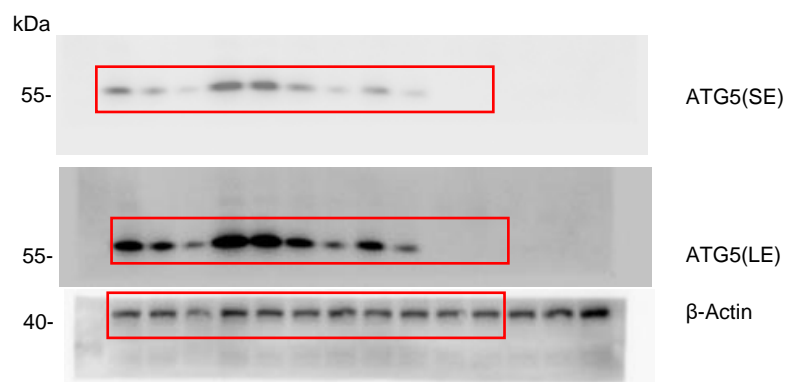**Fig 4K**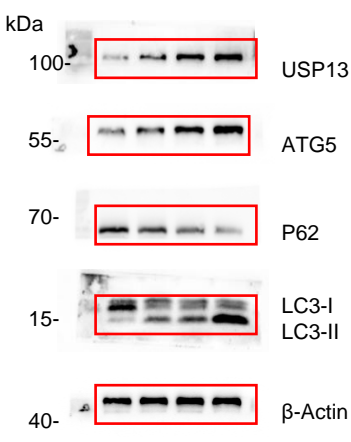**Fig 4L**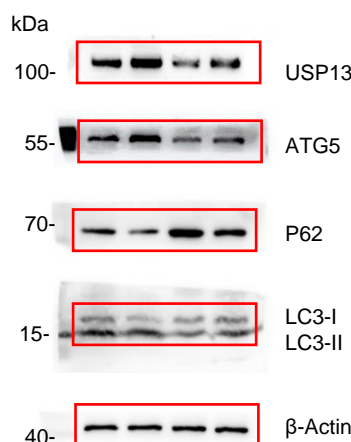**Fig 4N**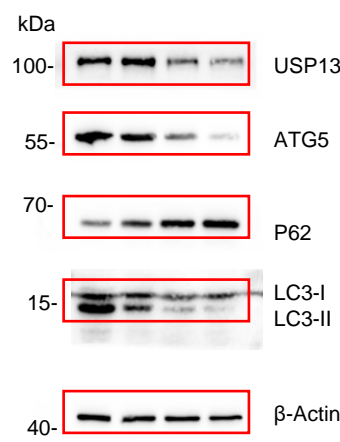**Fig 4O**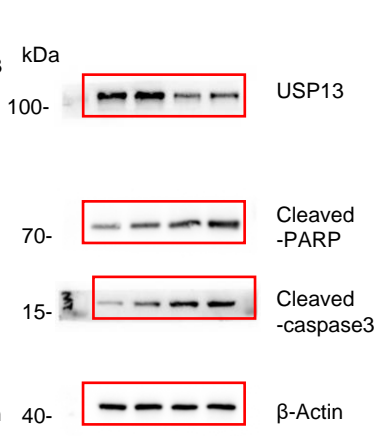

**Fig 5A**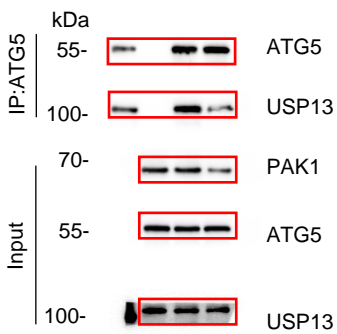**Fig 5B**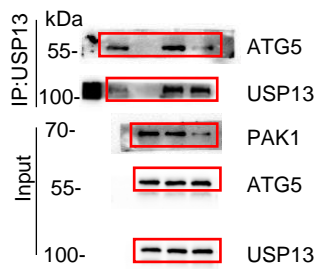**Fig 5C**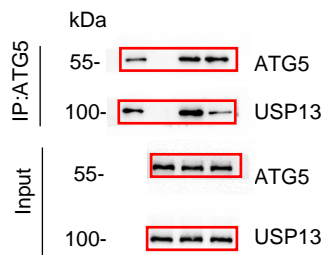**Fig 5D**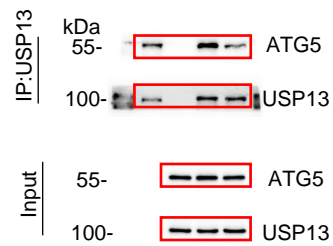**Fig 5E**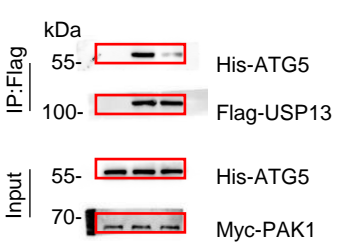**Fig 5F**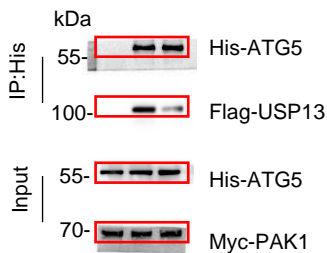**Fig 5G**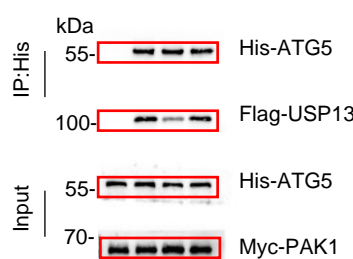**Fig 5H**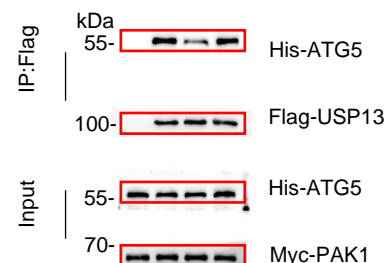**Fig 5I**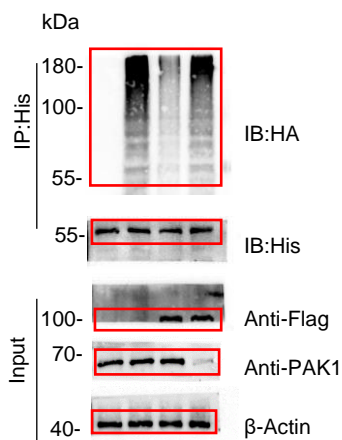**Fig 5J**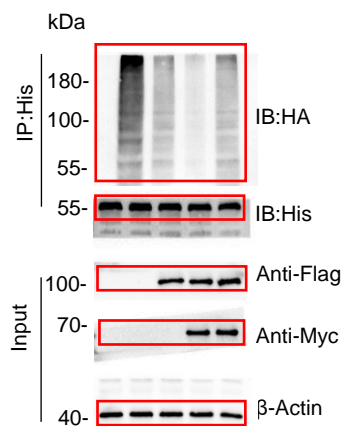**Fig 5K**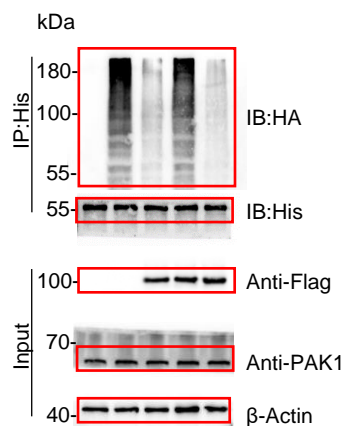**Fig 5L**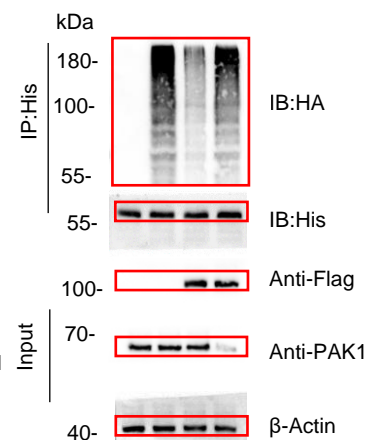

# Fig 6A

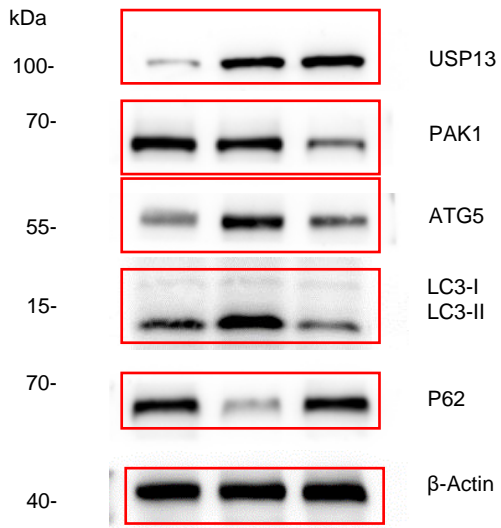

# Fig 6B

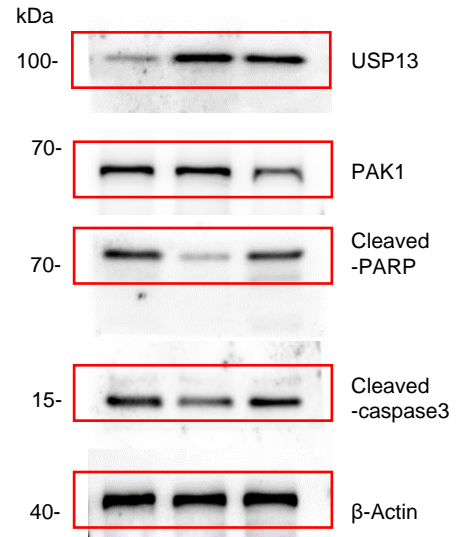

**Fig 7C**

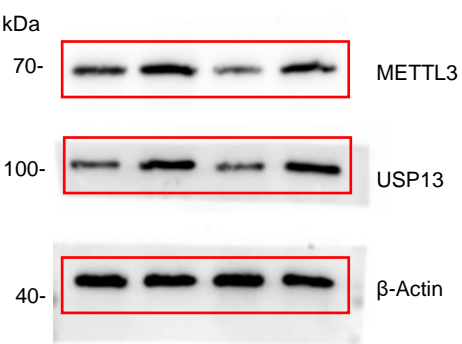

**Fig 7E**

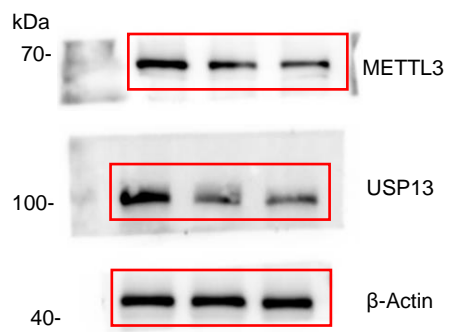

**Fig 7I**

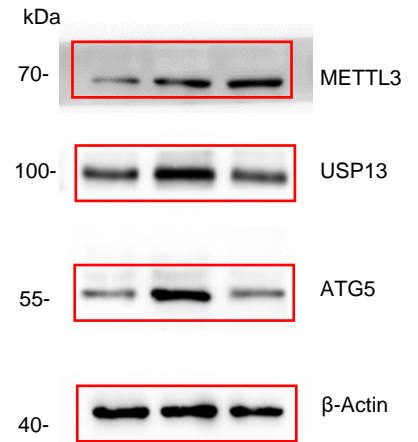

## Fig S1A

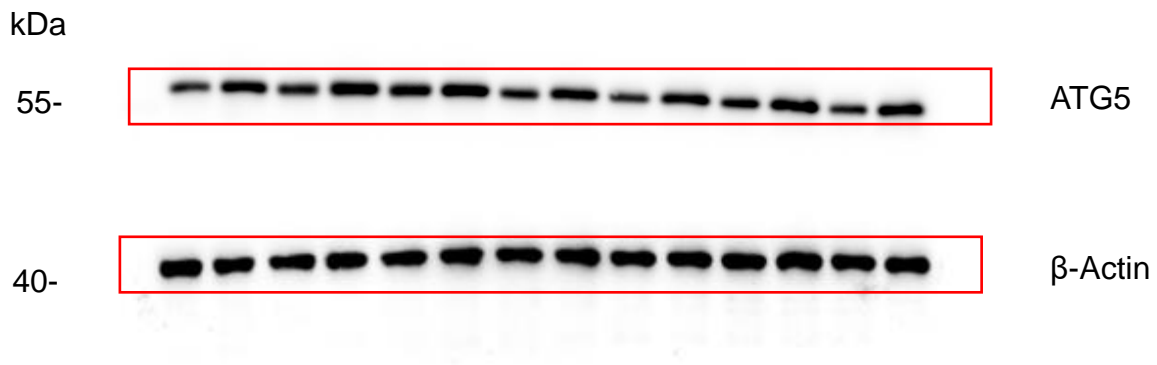

## Fig S1B

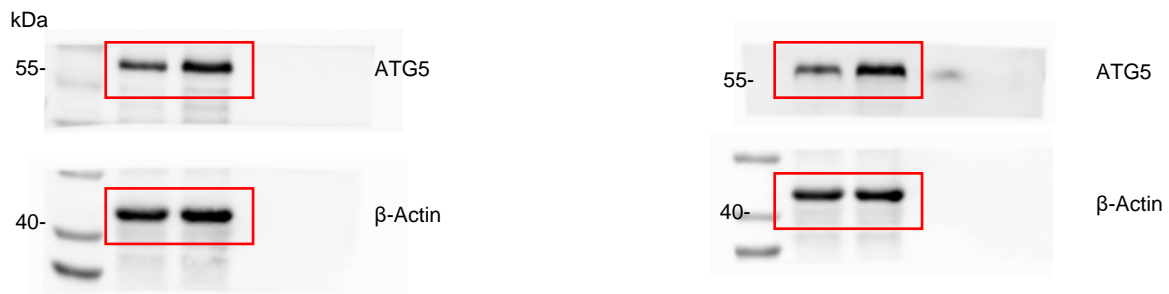

## Fig S1C

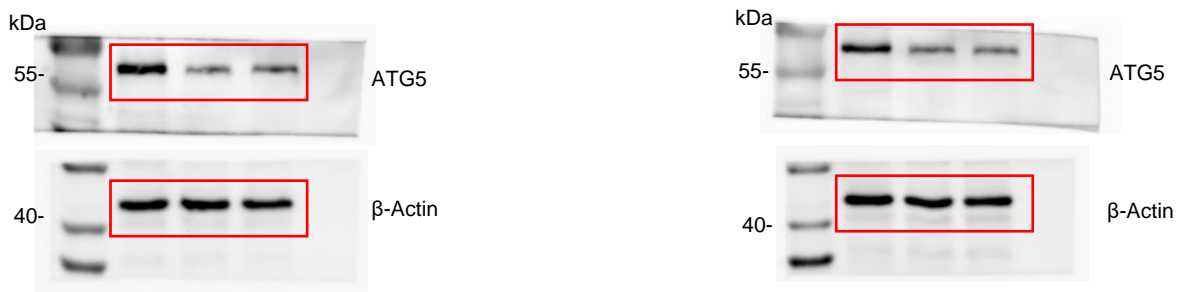



# Fig S2C

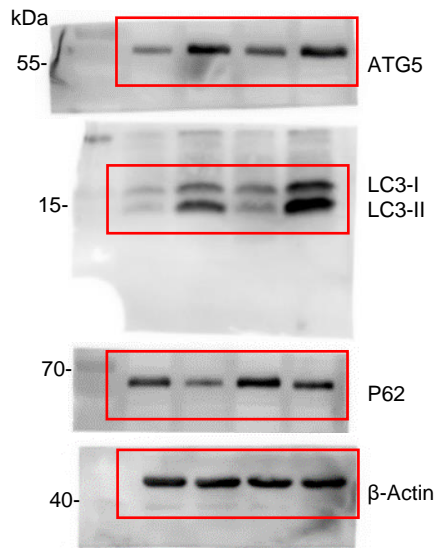

# Fig S2D

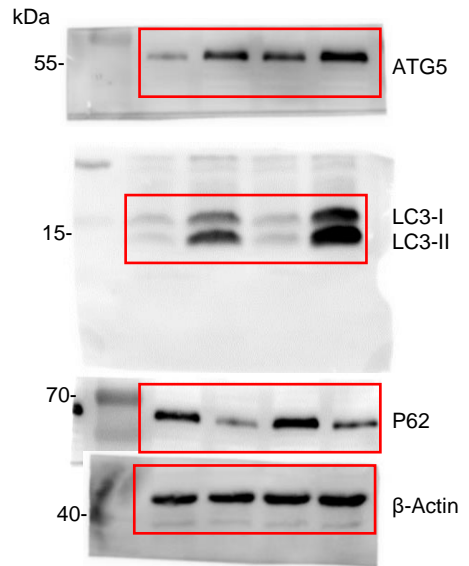

### Fig S3A

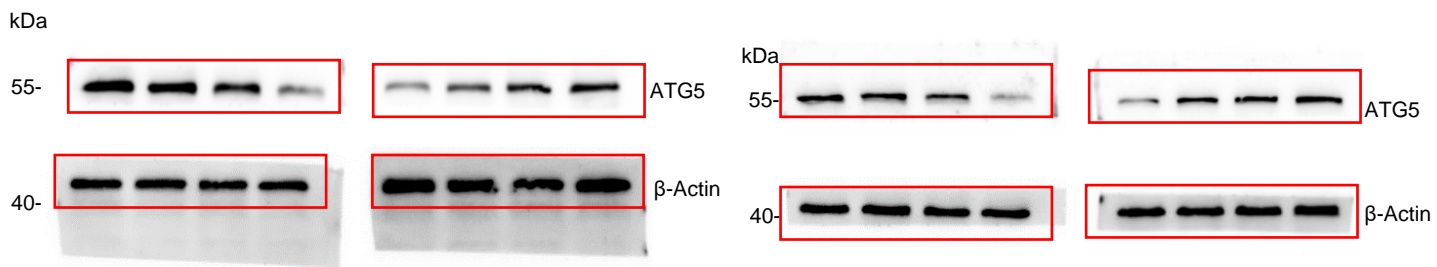

### Fig S3C

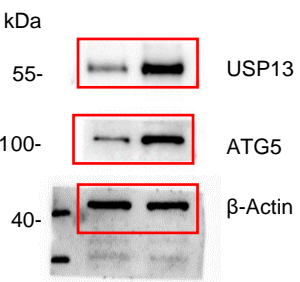

### Fig S3D

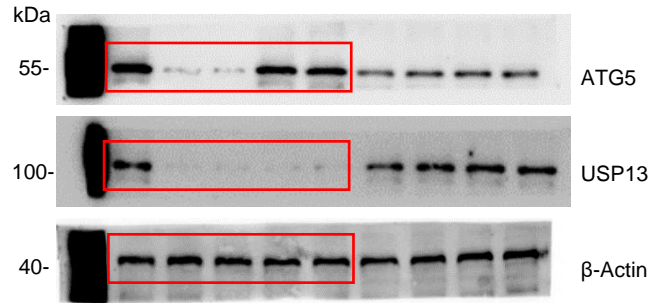

### Fig S3E

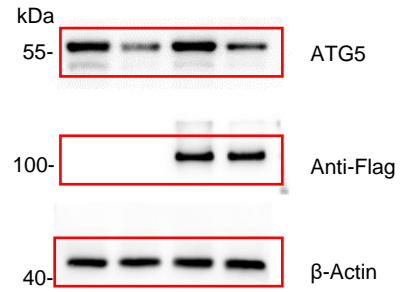

### Fig S3F

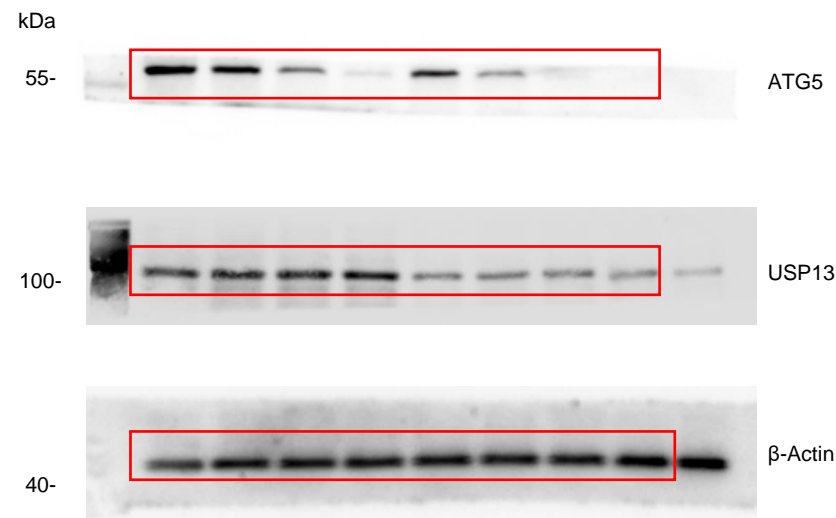

### Fig S3H

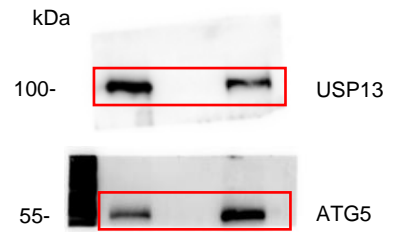

### Fig S3I

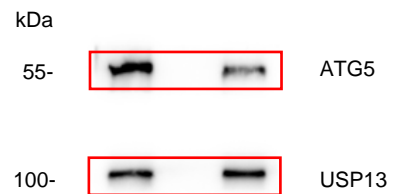

### Fig S4A

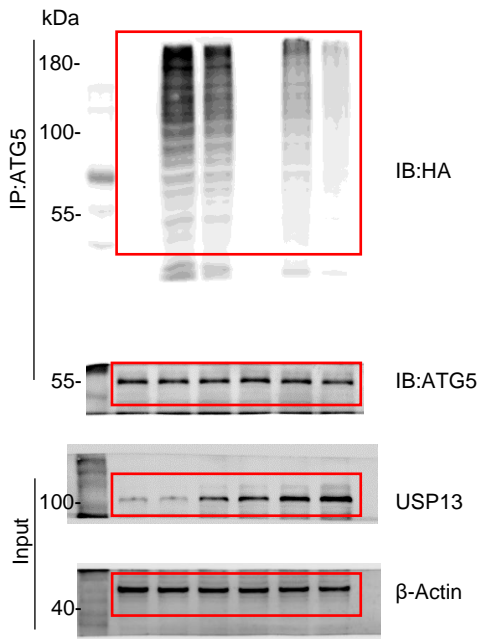

### Fig S4B

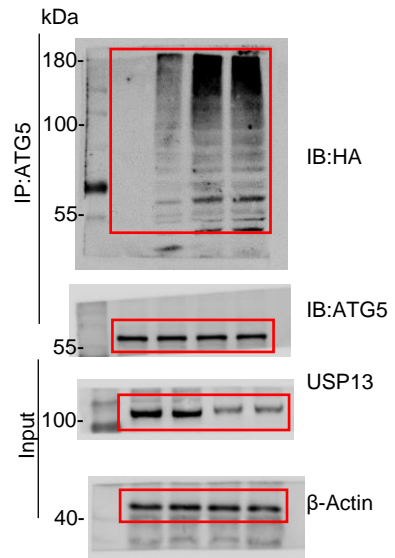

### Fig S4C

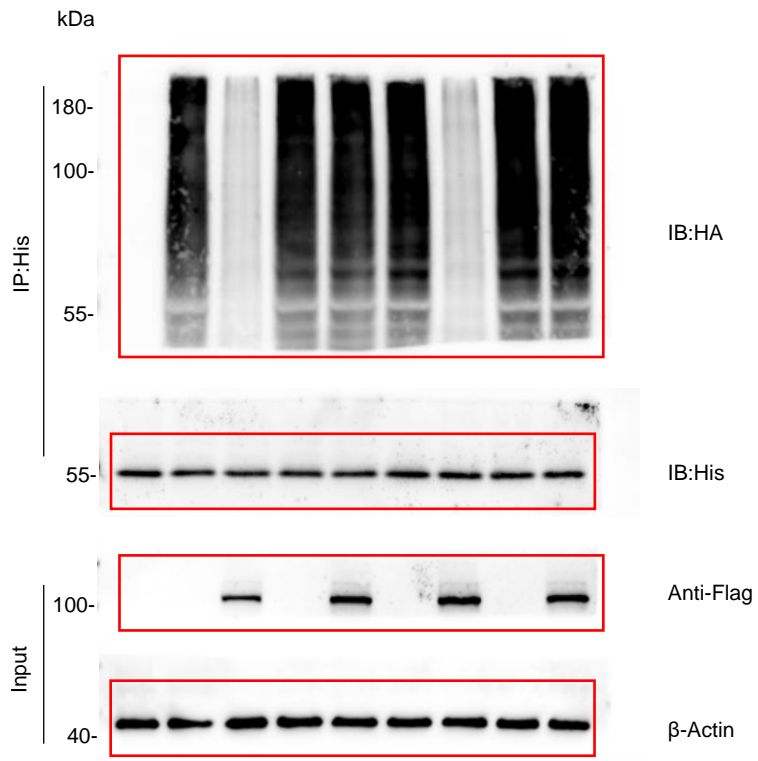

### Fig S4D

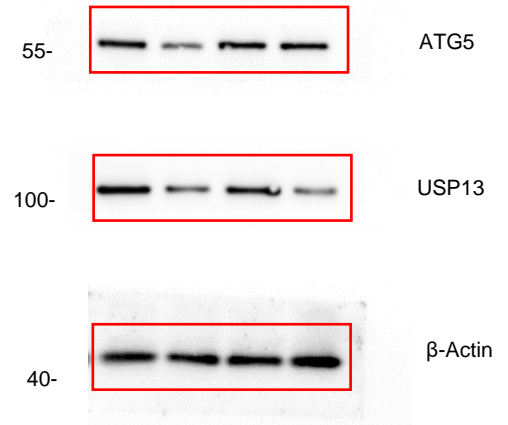

**Fig S5C**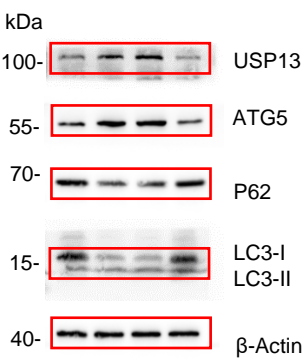**Fig S5D**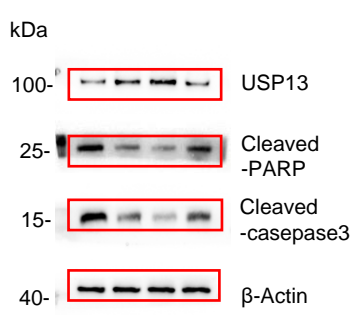**Fig S5I**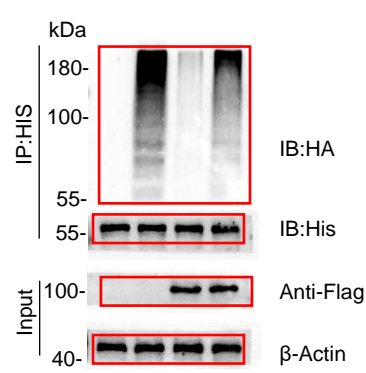**Fig S5J**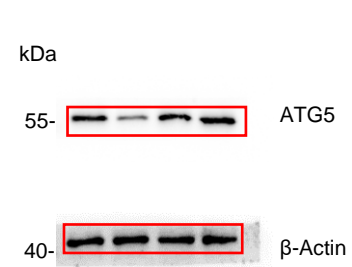**Fig S5K**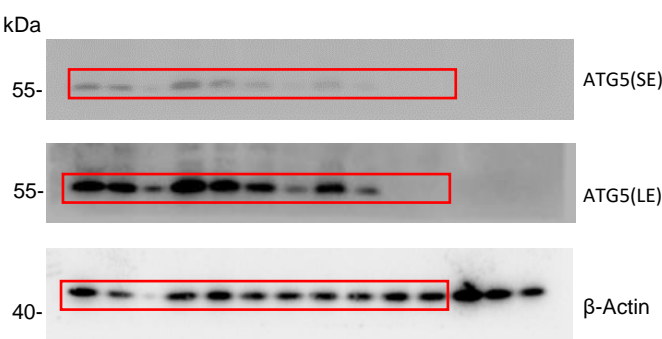**Fig S5L**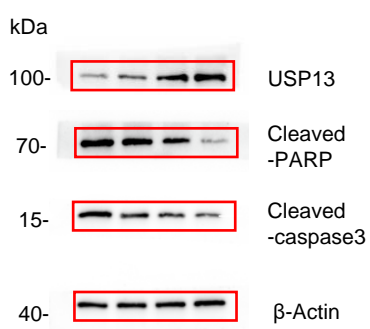**Fig S5M**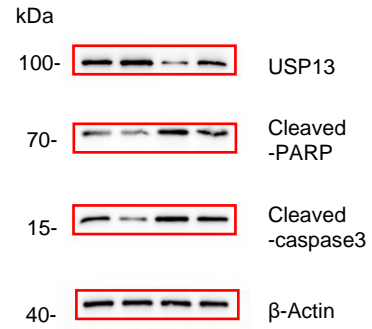

# Fig S6A

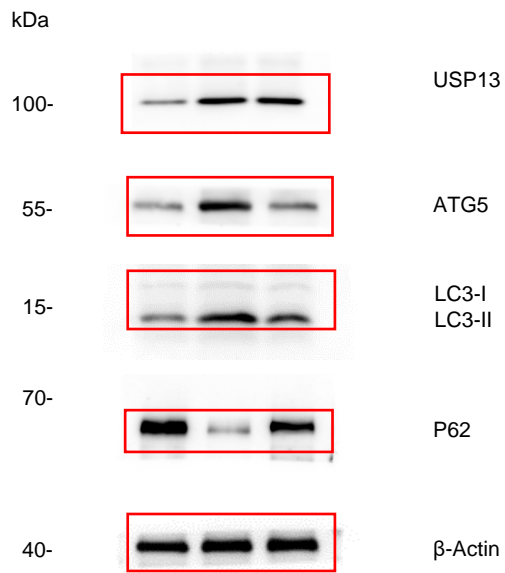

# Fig S6B

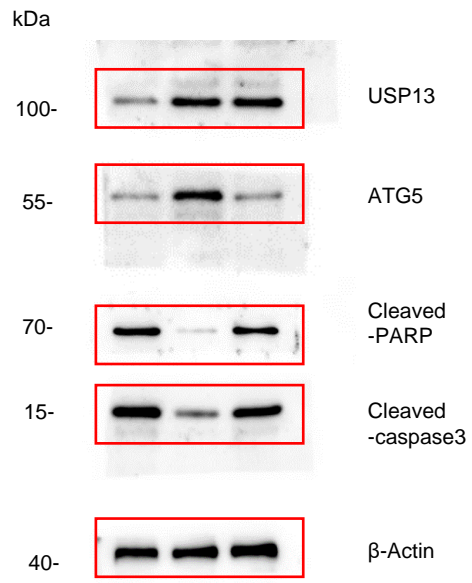

# Fig S7D

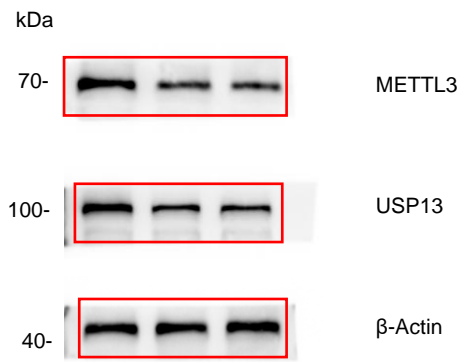

# Fig S7H

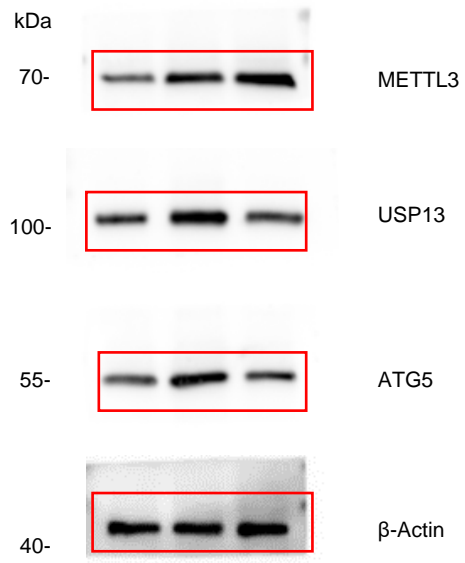

Supplement: 41418_2022_1107_MOESM11_ESM.pdf [file 41418_2022_1107_MOESM11_ESM.pdf]
